# Supplementary material for: Case Report: Long-Term Response to Radiotherapy Combined With Targeted Therapy in Histiocytic Sarcoma Harboring Mutations in MAPK and PI3K/AKT Pathways
Source: Front Oncol. 2021 Dec 6;11:755893. doi: 10.3389/fonc.2021.755893 (PMC8685210; doi:10.3389/fonc.2021.755893)
Supplement: Supplementary file 1 [file Table_1.xlsx]

## Sheet: Sheet1
NAME	DATE	GENE	TRANSCRIPT	BASE	EXON	FRENQ
	2017-12-18	MAP2K1	NM_002755.3	c.361T>A	EX3	0.176
		MYC	NM_002467.4	c.320G>A	EX2	0.167
		GRIN2A	NM_000833.4	c.3646A>T	EX13	0.165
		MET	NM_000245.3	c.2888-1G>T	IVS13	0.053
		EPOR	NM_000121.3	c.582G>C	EX4	0.038
		CDK12	NM_016507.2	c.1381G>A	EX2	0.035
		APC	NM_000038.5	c.5155G>C	EX16	0.034
		EPHA5	NM_004439.5	c.1541G>A	EX7	0.029
		ARID1A	NM-006015.6	c.3055G>A	EX11	0.016
		PIK3CG	NM_001282426.2	c.351G>C	EX2	0.016
		BCOR	NM_001123385.1	c.4321C>T	EX10	0.015
		ROBO3	NM_0022370.4	c.2017G>A	EX13	0.014
		HDAC1	NM_004964.2	c.429G>C	EX5	0.013
		IGF1R	NM_000875.5	c.2342G>A	EX11	0.01
	DATE	GENE	TRANSCRIPT	BASE	EXON	FRENQ
	2018-01-04	DUSP2	NM_004418.3	c.410G>A(p.G137D)	EX2	0.189
		HIST1H3B	NM_003537.3	c.290G>A(p.C97Y)	EX1E	0.159
		GRIN2A	NM_001134407.1	c.3646A>T(p.S1216C)	EX13E	0.157
		MEF2C	NM_001193347.1	c.389G>A(p.R130H)	EX6	0.1
		MET	NM_000245.2	c.2888-1G>T	IVS13	0.056
		APC	NM_000038.5	c.5155G>C(p.E1719Q)	EX16E	0.035
		CDK12	NM_016507.2	c.1381G>A(p.E461K)	EX2	0.03
		EPOR	NM_000121.3	c.582G>C(p.Q194H)	EX4	0.029
		EPHA5	NM_004439.5	c.1541G>A(p.S514N)	EX7	0.025
		ZRSR2	NM_005089.3	c.946G>C(p.E316Q)	EX11E	0.018
		KDM6A	NM_021140.2	c.687_688insGCTTATAAA(p.E229_Q230insAYK)	EX9	0.014
		BCOR	NM_001123385.1	c.4321C>T(p.Q1441*)	EX10	0.012
		HDAC1	NM_004964.2	c.429G>C(p.K143N)	EX5	0.011
